# Supplementary material for: Application of a micro-meso-structured reactor (NETmix) to promote photochemical UVC/H2O2 processes–oxidation of As(iii) to As(v)
Source: Royal Society of Chemistry journal article supplement (doi:10.1039/c8pp00006a), 2018-07-13
Supplement: c8pp00006a1.pdf [file c8pp00006a1.pdf]

## SUPPLEMENTARY MATERIAL

### **Application of a Micro-Meso-Structured Reactor (NETmix) to Promote Photochemical UVC/H<sub>2</sub>O<sub>2</sub> Processes - Oxidation of As(III) to As(V)**

Belisa A. Marinho<sup>1,2</sup>, M. J. Martín de Vidales<sup>1,3</sup>, Luciana P. Mazur<sup>1,2</sup>, L. Paulista<sup>1</sup>,  
Raquel O. Cristóvão<sup>1,\*</sup>, Diego A. Mayer<sup>4</sup>, José M. Loureiro<sup>1</sup>, Rui A.R. Boaventura<sup>1</sup>,  
Madalena M. Dias<sup>1</sup>, José Carlos B. Lopes<sup>1</sup>, Vítor J. P. Vilar<sup>1,\*</sup>

*<sup>1</sup>Laboratory of Separation and Reaction Engineering - Laboratory of Catalysis and  
Materials (LSRE-LCM), Department of Chemical Engineering, Faculty of Engineering,  
University of Porto, Rua do Dr. Roberto Frias, 4200-465, Porto, Portugal*

*<sup>2</sup>CAPES Foundation, Ministry of Education of Brazil, Brasília – DF 70040-020, Brazil*

*<sup>3</sup>Technical University of Madrid, Calle Ramiro de Maeztu, 7, 28040 Madrid, Spain*

*<sup>4</sup>Laboratório de Transferência de Massa e Simulação Numérica de Sistemas Químicos,  
Federal University of Santa Catarina, PO Box 476, CEP 88040-900 Florianópolis, SC,  
Brazil*

\*Corresponding authors:

Raquel O. Cristóvão:

*Tel:* +351 22 041 3606; *E-mail:* raquel.cristovao@fe.up.pt

Vítor J. P. Vilar:

*Tel:* +351 91 825 7824; *E-mail:* vilar@fe.up.pt

Fax: +351 22 508 1674

**Table S1 – NETmix geometrical characteristics.**

| <b>NETmix</b>                               |      |
|---------------------------------------------|------|
| <b><i>Window</i></b>                        |      |
| Length (cm)                                 | 13.6 |
| Width (cm)                                  | 7.6  |
| <b><i>Chambers</i></b>                      |      |
| Diameter (mm)                               | 6.5  |
| <b><i>Channels</i></b>                      |      |
| Length (mm)                                 | 2    |
| Width (mm)                                  | 1    |
| Quartz slab thickness (mm)                  | 5    |
| Geometry depth (mm)                         | 3    |
| Total volume (cm <sup>3</sup> )             | 23   |
| Total illuminated volume (cm <sup>3</sup> ) | 16.7 |
